# Supplementary material for: Influence of the Alcohols on the ZnO Synthesis and Its Properties: The Photocatalytic and Antimicrobial Activities
Source: MDPI journal article supplement (doi:10.3390/pharmaceutics14122842), 2022-12-18
Supplement: s1 [file s1]

# Influence of the alcohols on the ZnO synthesis and its properties. The photocatalytic and antimicrobial activities

Ludmila Motelica <sup>1,2</sup>, Bogdan-Stefan Vasile <sup>1,2,3</sup>, Anton Fikai <sup>1,2,3,4</sup>, Adrian-Vasile Surdu <sup>1,2,3</sup>, Denisa Fikai <sup>1,2,3</sup>, Ovidiu-Cristian Oprea <sup>1,2,3,4\*</sup>, Ecaterina Andronescu <sup>1,2,3,4</sup>, Dan Corneliu Jinga<sup>5</sup>, Alina Maria Holban<sup>6</sup>

<sup>1</sup> National Research Center for Micro and Nanomaterials, University Politehnica of Bucharest, 060042 Bucharest, Romania

<sup>2</sup> National Research Center for Food Safety, University Politehnica of Bucharest, Splaiul Independentei 313, 060042 Bucharest, Romania

<sup>3</sup> Faculty of Chemical Engineering and Biotechnologies, University Politehnica of Bucharest, 1-7 Polizu St., 011061 Bucharest, Romania;

<sup>4</sup> Academy of Romanian Scientists, Ilfov Street 3, 050044 Bucharest, Romania

<sup>5</sup> Department of Medical Oncology, Neolife Medical Center, Ficusului Bd. 40, 077190 Bucharest, Romania

<sup>6</sup> Microbiology & Immunology Department, Faculty of Biology, University of Bucharest, 077206 Bucharest, Romania

\* Correspondence: ovidiu.oprea@upb.ro or ovidiu73@yahoo.com

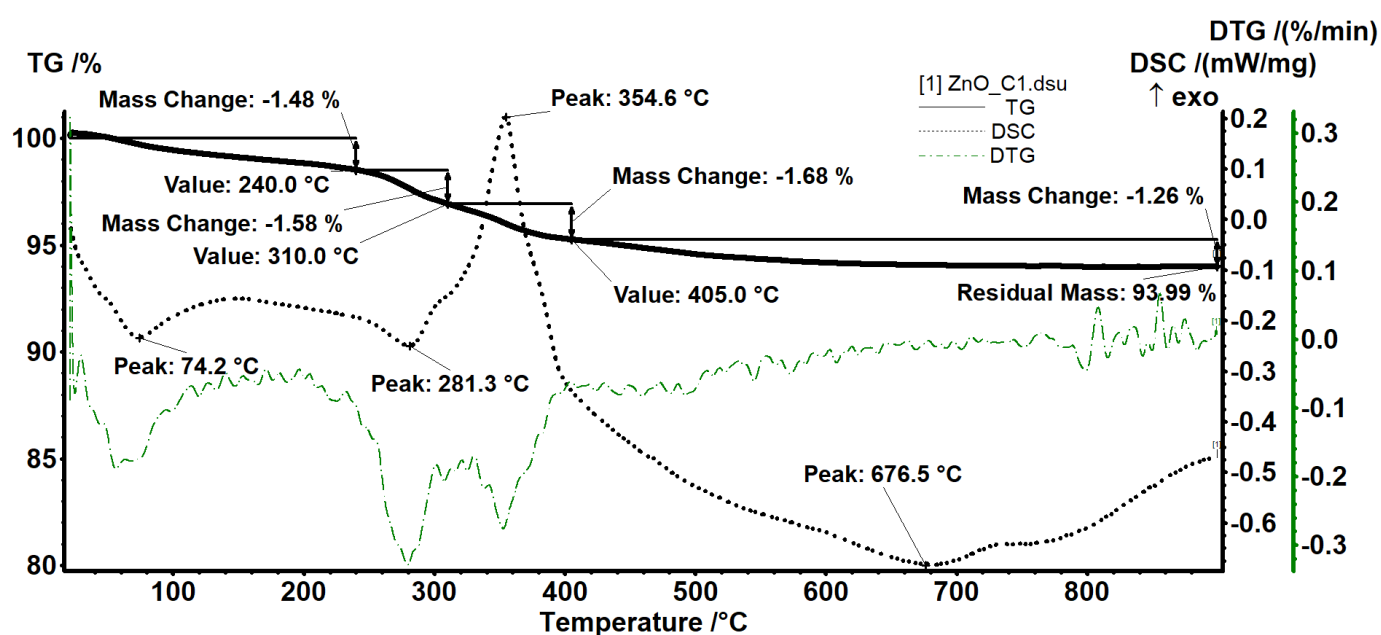

Figure S1. The thermal analysis, TG –DTG – DSC for the sample ZnO\_C1 – the nanopowder obtained from zinc acetate by using methanol as solvent.

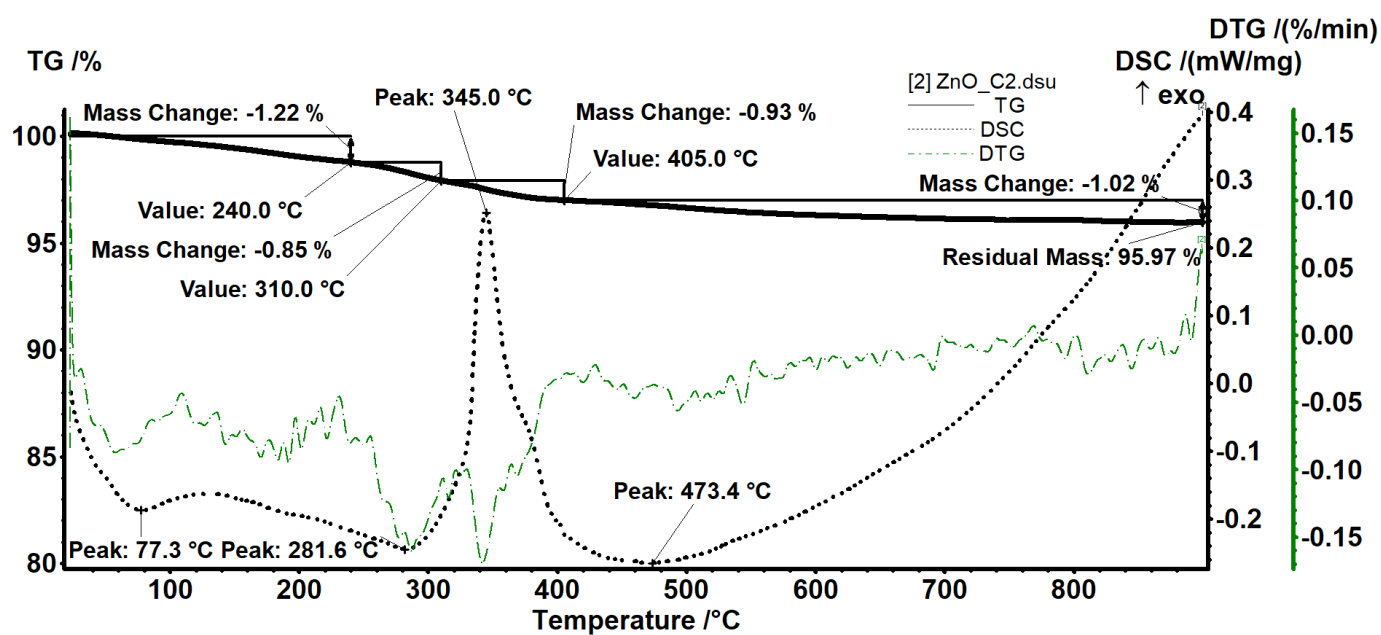

Figure S2. The thermal analysis, TG-DTG-DSC for the sample ZnO\_C2 – the nanopowder obtained from zinc acetate by using ethanol as solvent.

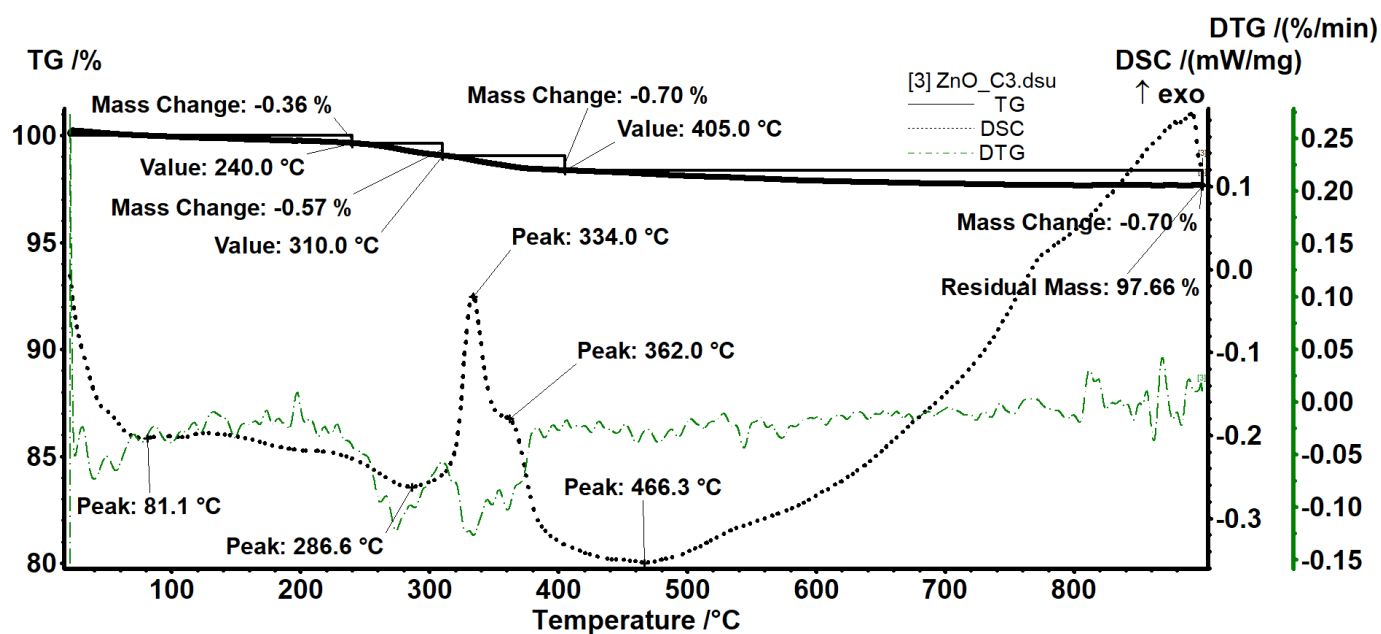

Figure S3. The thermal analysis, TG-DTG-DSC for the sample ZnO\_C3 – the nanopowder obtained from zinc acetate by using 1-propanol as solvent.

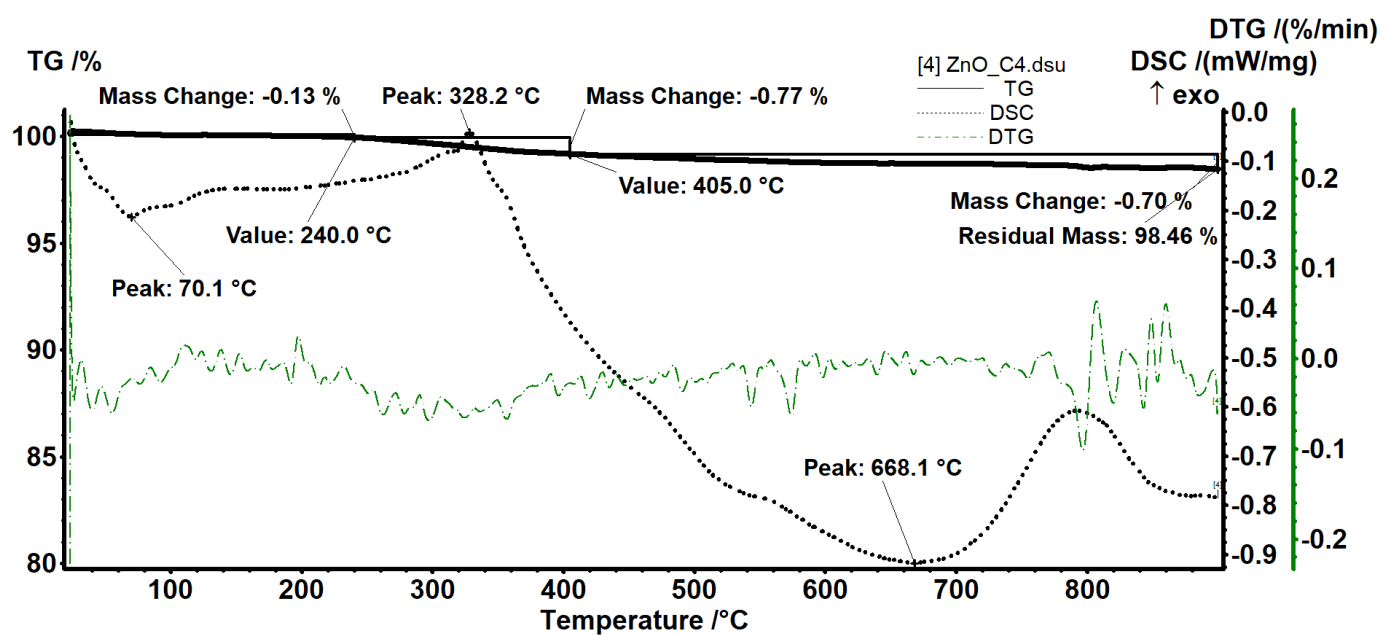

Figure S4. The thermal analysis, TG –DTG – DSC for the sample ZnO\_C4 – the nanopowder obtained from zinc acetate by using 1-butanol as solvent.

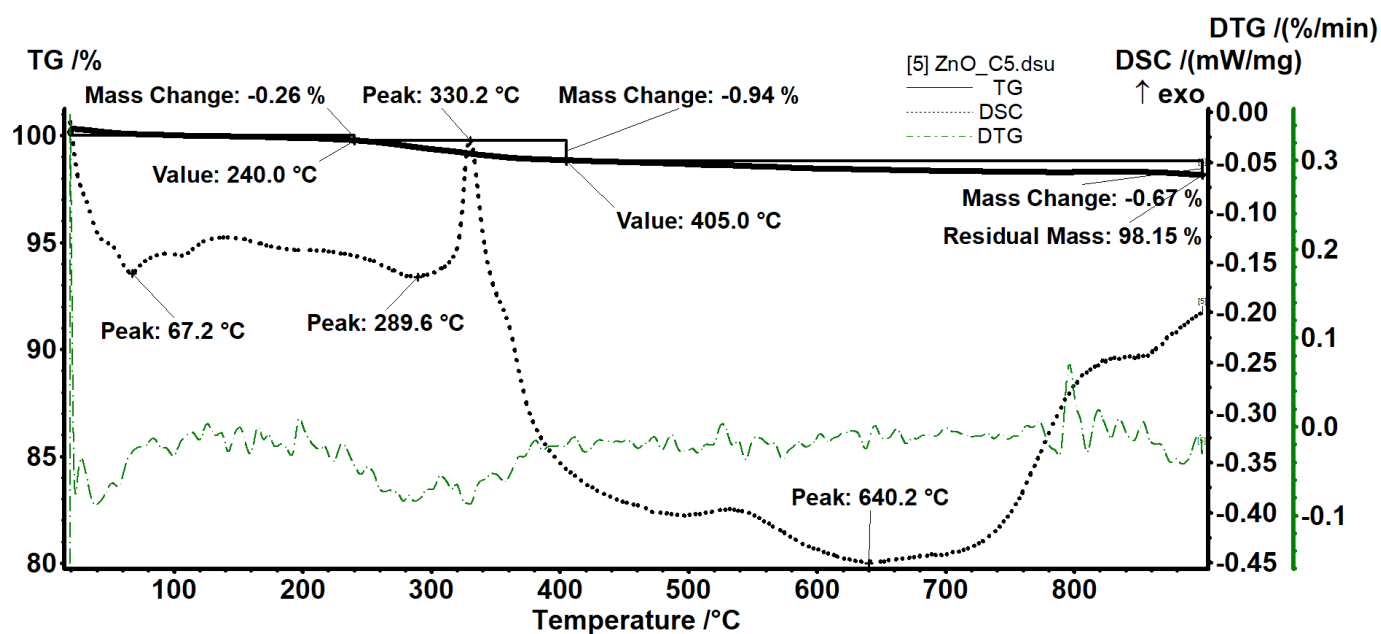

Figure S5. The thermal analysis, TG –DTG – DSC for the sample ZnO\_C5 – the nanopowder obtained from zinc acetate by using 1-pentanol as solvent.

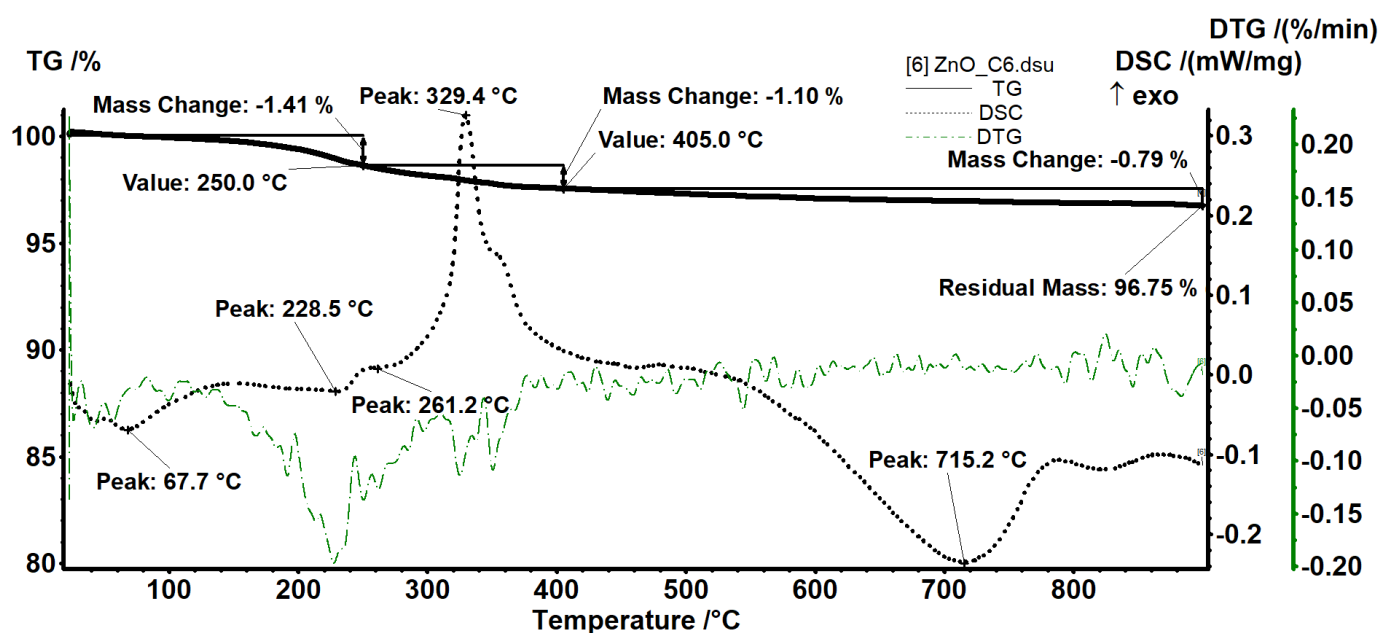

Figure S6. The thermal analysis, TG –DTG – DSC for the sample ZnO\_C6 – the nanopowder obtained from zinc acetate by using 1-hexanol as solvent.

**Table S1.** Principal data obtained from thermal analysis of the nanopowders obtained in primary alcohols (ZnO\_C1 in methanol; ZnO\_C2 in ethanol; ZnO\_C3 in 1-propanol; ZnO\_C4 in 1-butanol; ZnO\_C5 in 1-pentanol; ZnO\_C6 in 1-hexanol).

| Sample label | Mass loss<br>(20-240°C) | Endo<br>(°C) | Mass loss<br>240-310°C | Endo<br>(°C) | Mass loss<br>310-405°C | Exo<br>(°C) | Mass loss<br>(405-900°C) | Endo<br>(°C) |
|--------------|-------------------------|--------------|------------------------|--------------|------------------------|-------------|--------------------------|--------------|
| ZnO_C1       | 1.48%                   | 74.2°C       | 1.58%                  | 281.3°C      | 1.68%                  | 354.6°C     | 1.26%                    | 676.5°C      |
| ZnO_C2       | 1.22%                   | 77.3°C       | 0.85%                  | 281.6°C      | 0.93%                  | 345.0°C     | 1.02%                    | 473.4°C      |
| ZnO_C3       | 0.36%                   | 81.1°C       | 0.57%                  | 286.6°C      | 0.70%                  | 334.0°C     | 0.70%                    | 466.3°C      |
| ZnO_C4       | 0.13%                   | 70.1°C       | a                      | -            | 0.77% <sup>a</sup>     | 328.2°C     | 0.70%                    | 668.1°C      |
| ZnO_C5       | 0.26%                   | 67.2°C       | a                      | 289.6°C      | 0.94% <sup>a</sup>     | 330.2°C     | 0.67%                    | 640.2°C      |
| ZnO_C6       | 1.41% <sup>b</sup>      | 67.7°C       | a,b                    | 261.2°C      | 1.10% <sup>a,b</sup>   | 329.4°C     | 0.79%                    | 715.2°C      |

<sup>a</sup>For the samples ZnO\_C4, ZnO\_C5 and ZnO\_C6 the mass loss from 240-310°C is included in the figures from 310-405°C.

<sup>b</sup>For the ZnO\_C6 sample the measurement limit for first and second mass loss interval is 250°C.
